# Supplementary material
Source: PubMed Central journal article supplement (PMC4277680)
Supplement: NIHMS640297-supplement-Supplement1.pdf [file NIHMS640297-supplement-Supplement1.pdf]

## Supplementary Appendix

This appendix has been provided by the authors to give readers additional information about their work.

Supplement to: Gillespie SH, Crook AM, McHugh TD, et al. Four-month moxifloxacin-based regimens for drug-sensitive tuberculosis. *N Engl J Med* 2014;371:1577-87. DOI: 10.1056/NEJMoa1407426

(Updated October 30, 2014)

## Supplementary Appendix

Supplement to: Gillespie S, Crook A, McHugh T, et al. REMox TB: Two Four-Month Moxifloxacin-based Regimens for Drug-Sensitive Tuberculosis

|                                                   |         |
|---------------------------------------------------|---------|
| Extended list of study collaborators              | page 2  |
| Members, Trial Steering Committee                 | page 3  |
| Members, Independent Data Safety Monitoring Board | page 3  |
| ACTG Statement                                    | page 3  |
| Supplementary text                                | page 4  |
| Supplementary figures (S1 – S3)                   | page 7  |
| Supplementary tables (S1 – S10)                   | page 10 |

## **Extended list of study collaborators**

### ***\*The REMox TB Consortium includes:***

*Task Applied Sciences and Stellenbosch University, South Africa – A. Diacon, M. Hanekom, A. Venter;*

*University of Cape Town, South Africa – R. Dawson, K. Narunsky;*

*Mbeya Medical Research Programme, Tanzania – B. Mtafya, N. Elias Ntinginya, A. Rachow;*

*Centre for Respiratory Disease Research at KEMRI, Kenya – E. Amukoye, B. Miheso, M. Njoroje;*

*Kilimanjaro Christian Medical Center, Tanzania – N. Sam, D. Damas, A. Liyoyo;*

*Institute of Respiratory Medicine Jalan Pahang, Malaysia – A. Ahmad Mahayiddin;*

*Chest Disease Institute, Thailand – C. Chuchottaworn, J. Boonyasopun, B. Saipan;*

*University of Zambia & University Teaching Hospital, Zambia – S. Lakhi, D. Chanda, J. Mbyeze;*

*Medical Research Council, South Africa – A. Pym, N.Ngcobo;*

*Madibeng Centre for Research, South Africa – C. Louw, H. Veldsman;*

*Hospital General de Occidente de la Secretaría de Salud del Estado de Jalisco, Mexico– G. Amaya-Tapia, T. Vejar Aguirre;*

*Dr. D. K. Chauhan Clinic, India – D. K. Chauhan*

*Dr. R. K. Garg's Clinic, India – R. K. Garg*

*Dr. Nirmal Kumar Jain Clinic, India– N.K Jain*

*Indra Nursing Home and Maternity Centre, India – A. Aggarwal*

*Mahatma Gandhi Medical College & Hospital, India 302022 – M. Mishra;*

*Dr. Sanjay Teotia Clinic, India – S. Teotia*

*Aurum, Tembisa Hospital, South Africa – S. Charalambous, N. Hattidge, L. Pretorius;*

*University of Kwa-Zulu Natal, South Africa (ACTG Site)– N. Padayachi;*

*Perinatal HIV Research Unit, Chris Hani Baragwanath Hospital, South Africa (ACTG Site) – L. Mohapi;*

*Beijing Tuberculosis and Thoracic Tumor Research Institute, China – M. Gao, X. Li, L. Zhang;*

*Shanghai Pulmonary Hospital, China –Q. Zhang;*

*Siddharth Nursing Home, India – S. Aggarwal*

+++++++

*TB Alliance* – K. Belizaire, M. Benhayoun, D. Everitt, A. Ginsberg, M. Laurenzi, B. Rawls, C. Ridali, M. Spigelman, A. Uys, C. van Niekerk;

*University College London* – A. Bateson, M. Betteridge, S. Birkby, E. Bongard, M. Brown, H. Ciesielczuk, C. Cook, E Cunningham, J. Huggett, R. Hunt, C. Ling, M. Lipman, P. Mee, M. Murphy, S. Murthy, F. Perrin, R. Shorten, K. Singh, K. Smith, V. Yorke-Edwards, A. Zumla;

+++++++

## **Trial Steering Committee and the Independent Data Safety Monitoring Board**

We wish to acknowledge the Trial Steering Committee, which includes Dr. John Magee, Dr. Rick O'Brien, Professor Peter Ormerod.

We also wish to acknowledge the Independent Data Safety Monitoring Board which includes Dr. Katherine Fielding, Dr. Alwyn Mwinga, and Professor Tim Peto.

+++++++

## **ACTG Statement**

Research reported in this publication was supported in part by the National Institute of Allergy and Infectious Diseases of the National Institutes of Health under Award Numbers UM1AI068634, UM1 AI068636, and UM1AI106701 (University of Kwa-Zulu Natal, South Africa, NIAID funded ACTG site 31422, Grant #1U01AI069469; Perinatal HIV Research Unit, Chris Hani Baragwanath Hospital, South Africa, NIAID funded ACTG site 12301, Grant #1U01AI069453; Durban International Clinical Trials Unit, South Africa, NIAID funded ACTG site 11201, Grant #1U01AI069426). The content is solely the responsibility of the authors and does not necessarily represent the official views of the National Institutes of Health.

## Supplementary text

### 1. Summary of Drug Dosing

Weight adjusted treatment was blinded and matching placebo was provided for all drugs except pyrazinamide (see Supplementary Table S2 for details). Patients co-infected with HIV could be given cotrimoxazole prophylaxis and anti-retrovirals were commenced according to local HIV/AIDS guidelines with efavirenz substituted for nevirapine if required. Treatment was given daily and was observed according to local guidelines.

### 2. Exclusions from the main analyses

#### 2.1 Exclusion from the modified intention to treat (MITT) analysis

1. Patients with MDR disease documented from samples taken at enrolment or week 1 (late exclusions from the study)
2. Patients without culture confirmation of tuberculosis at enrolment or weeks 1 or 2 around enrolment, from screening to week 2 (late exclusions from the study)
3. Patients withdrawn from treatment because of a protocol violation at enrolment (late exclusions from the study, based on data collected prior to randomisation)
4. Patients who, having completed the treatment phase at Month 6, are lost to follow-up or withdrawn from the study, their last status being culture negative and their last positive culture result (“isolated positive culture”) followed by at least two negative culture results (without an intervening positive culture)
5. Women who become pregnant during the 6-month treatment phase and stop their allocated treatment
6. Patients who died during the treatment phase from violent or accidental cause (e.g. road traffic accident). N.B.: This does not include death from suicide, which will be considered an unfavourable outcome.
7. Patients who died during the follow-up phase with no evidence of failure or relapse of their TB, their last status being culture negative and their last positive culture result (“isolated positive culture”) followed by at least two negative culture results, and who have not already been classified as unfavourable.
8. Patients who, after being classified as having culture negative status, are re-infected with a new strain different from that with which they were originally infected. “Reinfection” will be defined specifically as a patient infected with a strain that is different from the initial strain as defined by MIRU and IS6110 typing. Assessments of relapse vs. reinfection will be made before database lock and unblinding.
9. Patients who are able to produce sputum at 18 months, but whose 18-month visit sputum samples are all (L-J and MGIT) contaminated or missing, who cannot be brought back for repeat cultures, provided they have not already been classified as unfavourable and provided their last positive culture was followed by at least two negative cultures. N.B.: This does not apply to patients who are unable to produce sputum at 18 months, or to patients who are able to be brought back subsequently and produce negative cultures.

Patients in categories 4-8 above who had already been classified as having an unfavourable outcome will not be excluded.

#### 2.2 Additional exclusions from the per protocol (PP) analysis

1. Patients not meeting the definition of having received an adequate amount of their allocated study regimen (see below), provided they have not already been classified as having an unfavourable outcome

2. Patients lost to follow-up or withdrawn before the Month 6 visit, unless they have already been classified as having an unfavourable outcome.
3. Patients whose treatment was modified or extended for reasons (e.g. an adverse drug reaction or pregnancy) other than an unfavourable therapeutic response to treatment, unless they have already been classified as having an unfavourable outcome
4. Patients who are classified as “major protocol violations”, unless they have already been classified as having an unfavourable outcome on the basis of data obtained prior to the protocol violation

### **2.3 Definition of adequate treatment**

The definition of adequate treatment sets limits both for the amount of treatment missed in each treatment phase and the amount of treatment missed overall. For patients allocated to a 4 month regimen, to meet the definition of adequate treatment, the patients must have:

1. Taken a total of at least 42 doses of their allocated intensive phase treatment within 70 days of starting treatment
2. AND taken at least 42 doses of their continuation phase treatment within 84 days of completion of the intensive phase
3. AND missed no more than 28 doses of medication overall

For patients allocated to the 6 month regimen, to meet the definition of adequate treatment, the patients must have:

1. Taken a total of at least 42 doses of their allocated intensive phase treatment within 70 days of starting treatment
2. AND taken at least 84 doses of their continuation phase treatment within 168 days of completion of the intensive phase
3. AND missed no more than 42 doses of medication overall

These definitions are consistent with those used to define per protocol populations in the original trials which determined the effectiveness of the control 6 month isoniazid-rifampicin based regimen.

## **3. Definition of primary outcome for PP population**

### **3.1 Unfavourable status**

1. Patients not classified as having achieved or maintained culture negative status when last seen, or
2. Patients previously classified as having culture negative status who, following the end of treatment, have two positive cultures without an intervening negative culture, or
3. Patients who had a positive culture not followed by at least two negative cultures when last seen, or
4. Patients dying from any cause during the 6 month treatment phase, except from violent or accidental cause (e.g. road traffic accident), not including suicide (e.g., suicide will be considered an unfavourable outcome), or
5. Patients dying from TB related cause during the follow-up phase, or
6. Patients requiring a restart or a change of treatment because of an unfavourable outcome with or without bacteriological confirmation, i.e. on bacteriological, radiographic or clinical grounds

In all cases, “positive culture” refers to the culture being positive for M.tb. Patients found to be re-infected with a strain different from their original isolate are excluded from the analysis), although a sensitivity analysis will be performed in which these patients are classified as having unfavourable outcomes.

### **3.2 Favourable status**

Patients with a negative culture status at 18 months (at or after 72 weeks), who had not already been classified as having an unfavourable outcome, and whose last positive culture result (“isolated positive culture”) was followed by at least two negative culture results.

## **4. Definition of primary outcome for MITT population**

### **4.1 Unfavourable status**

1. Patients not classified as having achieved or maintained culture negative status when last seen, or
2. Patients previously classified as having culture negative status who, following the end of treatment, have two positive cultures without an intervening negative culture, or
3. Patients who had a positive culture not followed by at least two negative cultures when last seen, or
4. Patients dying from any cause during the 6 month treatment phase, except from violent or accidental cause (e.g. road traffic accident), not including suicide (eg, suicide will be considered an unfavourable outcome) or
5. Patients dying from TB related cause during the follow-up phase or
6. Patients requiring an extension of their treatment beyond that permitted by the protocol, a restart or a change of treatment for any reason except reinfection or pregnancy, or
7. Patients failing to complete an adequate course of treatment (as defined above) who were unassessable at 18 months, or
8. Patients lost to follow up or withdrawn from the study before the 6-month visit

In all cases, “positive culture” refers to the culture being positive for M.tb. Patients found to be re-infected with a strain different from their original isolate are excluded from the analysis (and this includes TB deaths), although a sensitivity analysis will be performed in which these patients are classified as having unfavourable outcomes. NB: in the absence of MIRU data, the TB will be assumed to be the original strain. If a patient never achieves culture negative status, the MIRU data will not be used for outcome classification.

### **4.2 Favourable status**

Patients with culture negative status at 18 months (at or after 72 weeks), who had not already been classified as having an unfavourable outcome, and whose last positive culture result (“isolated positive culture”) was followed by at least two negative culture results.

## **5. Excluded sites**

Following partial closure of the Durban site after an investigation for fraud (involving 14 patients), and following an audit at a U.S. based supporting laboratory of the Mexican site (involving 22 patients), the outcome for these patients was deemed “unassessable” for the purposes of all efficacy analyses. The patients were included in safety and sensitivity analyses of efficacy. These decisions were taken before unblinding of the data.

## Supplementary figures

Figure S1 REMoxTB Trial schematic describing the regimens and visit schedule

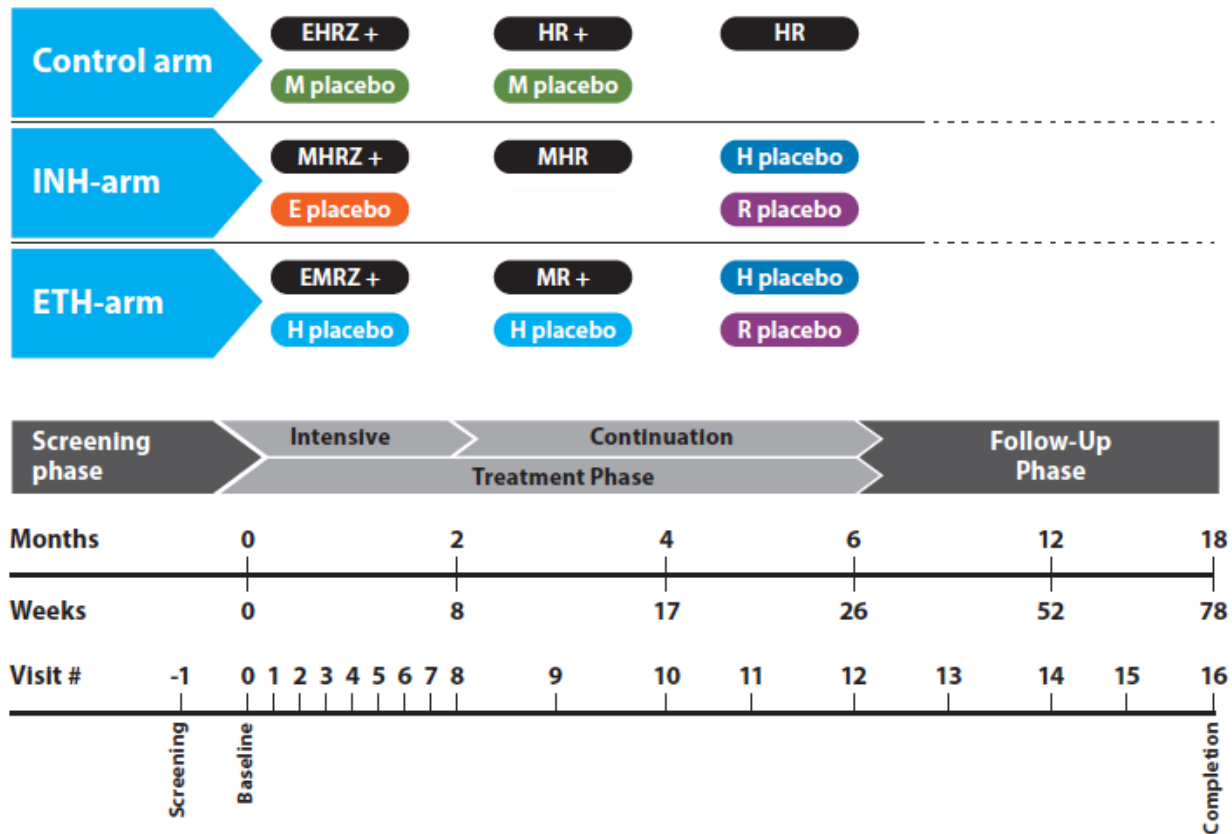



Figure S2 Graphical representation of difference from control with 97.5% confidence intervals.

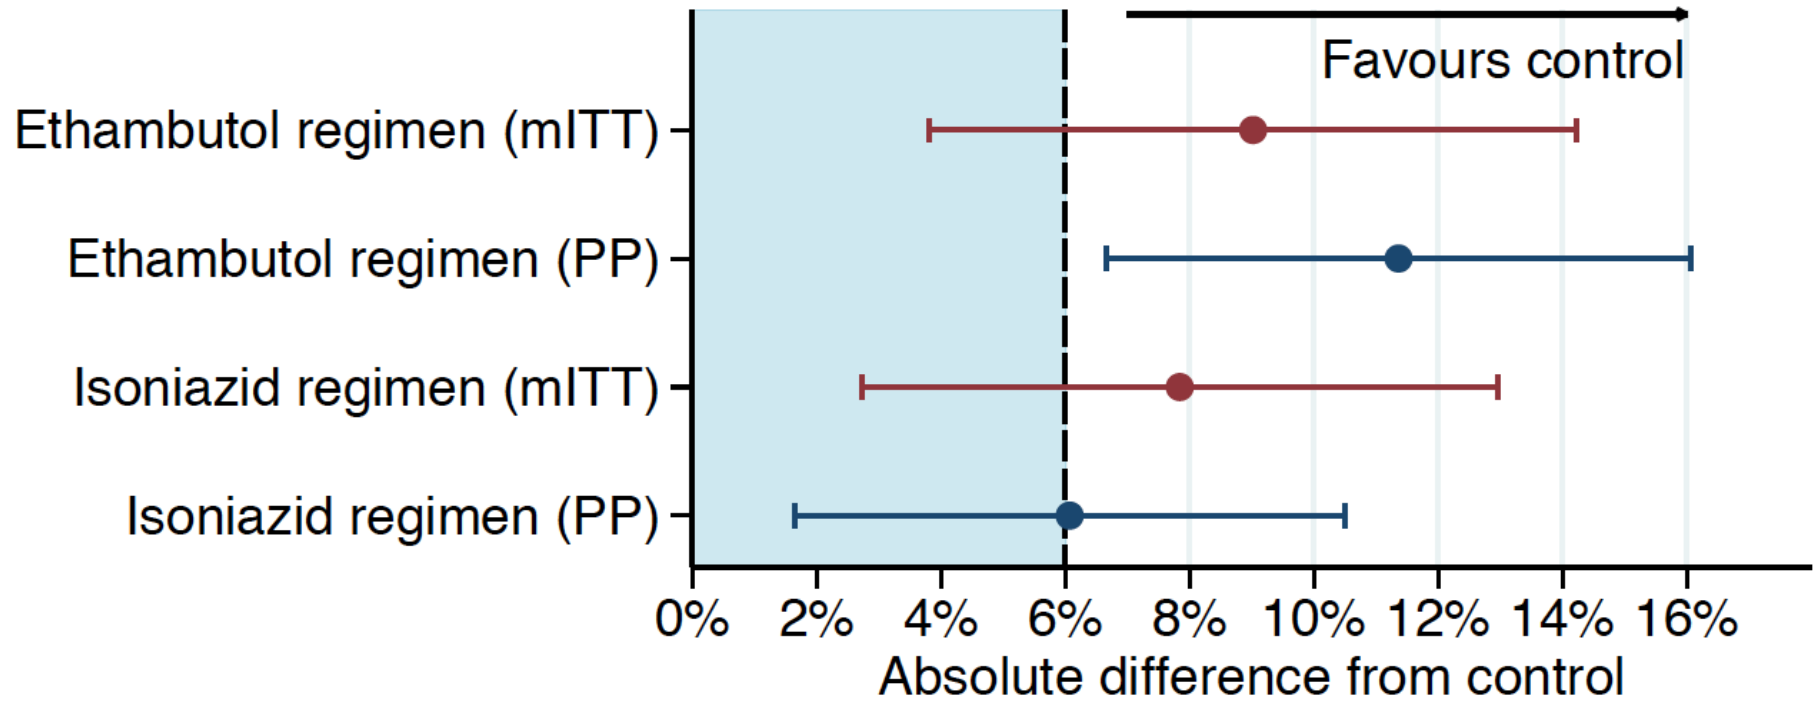

Figure S3 Time to culture negative status using MGIT liquid medium. Analysis include all patients excluding late screening failures

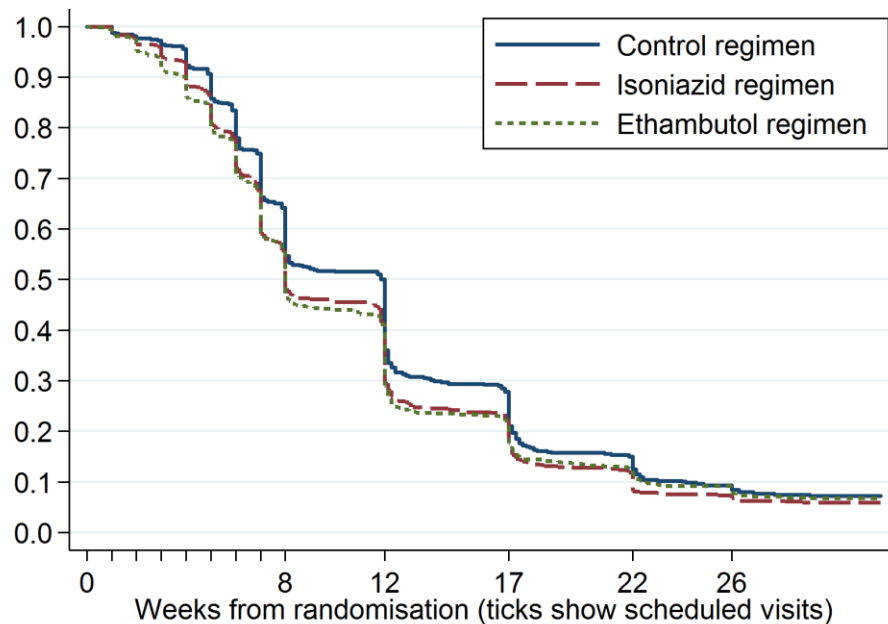

Number at risk

|            | 0   | 4   | 8   | 12  | 17  | 22 | 26 |
|------------|-----|-----|-----|-----|-----|----|----|
| Control    | 600 | 561 | 371 | 289 | 159 | 52 |    |
| Isoniazid  | 617 | 548 | 323 | 236 | 126 | 40 |    |
| Ethambutol | 604 | 537 | 327 | 240 | 128 | 49 |    |

## Supplementary tables

**Table S1 List of all inclusion and exclusion criteria**

### **Inclusion criteria**

Signed written consent or witnessed oral consent in the case of illiteracy, before undertaking an trial related activity

Two sputum specimens positive for tubercle bacilli on direct smear microscopy of which one confirmed by the REMoxTB study laboratory at the local laboratory

No history of previous anti-tuberculosis chemotherapy

Aged 18 years and over

A firm home address that is readily accessible for visiting and willingness to inform the study team of any change of address during the treatment and follow-up period

Agreement to participate in the study and to give a sample of blood for HIV testing

Negative pregnancy test (women of childbearing potential)

Pre-menopausal women must be using a barrier form of contraception or be surgically sterilised or have an IUCD in place

Laboratory parameters performed at least 14 days prior to enrolment

Serum aspartate transaminase (AST) and alanine transaminase (ALT) activity less than 3 times the upper limit of normal.

Serum total bilirubin level less than 2.5 times upper limit of normal.

Creatinine clearance (CrCl) level greater than 30 mls/min.

Haemoglobin level of at least 7.0 g/dL.

Platelet count of at least  $50 \times 10^9$  cells/L.

Serum potassium greater than 3.5 mmol/L

### **Exclusion criteria**

Patients unable to take oral medication.

Previously enrolled in this study

Receiving any investigational drug in the past 3 months or an antibiotic active against *M. tuberculosis*.

Pregnancy or breast-feeding.

Any condition that may prove fatal during the first two months of the study period.

Severe tuberculosis with high risk of a poor outcome (e.g., meningitis).

A pre-existing condition likely to prejudice the response to, or assessment of treatment, a condition likely to lead to uncooperative behaviour

A contraindication to any medications in the study regimens

A congenital or sporadic cardiac syndrome or taking medications that could result in QTc prolongation

Patients already receiving anti-retroviral therapy.

Weight less than 35kg.

HIV infection with CD4 count less than 250 cells/ $\mu$ L.

End stage liver failure (class Child-Pugh C).

Patients whose initial isolate was shown to be multiple drug resistant or mono-resistant to rifampicin, or any fluoroquinolone were excluded.

**Table S2 Drug Dose for daily therapy**

Moxifloxacin 400 mg

Rifampicin

< 45 kg 450 mg

> 45 kg 600 mg

Isoniazid 300 mg

Pyrazinamide

< 40 kg 25 mg/kg rounded to nearest 500 mg\*

40-55 kg 1000 mg

> 55 kg – 75 kg 1500 mg

> 75 kg 2000 mg

Ethambutol

< 40 kg 15 mg/kg rounded to nearest 100 mg

40-55 kg 800 mg

> 55 kg – 75 kg 1200 mg

> 75 kg 1600 mg

\* for pyrazinamide dosing in patients < 40 kg, 1000 mg used instead of 500 mg

**Table S3A Summary of sensitivity analyses**

| Analysis                                                         | Control arm                       |                                   | Isoniazid arm                      | Ethambutol arm                    |                                    |
|------------------------------------------------------------------|-----------------------------------|-----------------------------------|------------------------------------|-----------------------------------|------------------------------------|
|                                                                  | N unfavourable / N assessable (%) | N unfavourable / N assessable (%) | Difference from control (97.5% CI) | N unfavourable / N assessable (%) | Difference from control (97.5% CI) |
| <b>Per Protocol Analyses (PP)</b>                                |                                   |                                   |                                    |                                   |                                    |
| Primary analysis: adjusted for stratification factors            | 43/510 (8%)                       | 78/514 (15%)                      | 6.07% (1.65%, 10.50%)              | 105/524 (20%)                     | 11.36% (6.66%, 16.06%)             |
| Adjusted for additional covariates                               |                                   |                                   | 5.13% (0.56%, 9.71%)               |                                   | 10.74% (6.02%, 15.47%)             |
| Unadjusted                                                       |                                   |                                   | 6.74% (2.25%, 11.24%)              |                                   | 11.61% (6.81%, 16.40%)             |
| All deaths as unfavourable                                       | 48/515 (9%)                       | 84/520 (16%)                      | 6.28% (1.77%, 10.78%)              | 105/524 (20%)                     | 10.51% (5.76%, 15.25%)             |
| Primary endpoint based on only LJ results                        | 43/501 (9%)                       | 78/500 (16%)                      | 7.02% (2.42%, 11.61%)              | 105/507 (21%)                     | 12.13% (7.21%, 17.04%)             |
| Primary endpoint based only on MGIT result                       | 65/498 (13%)                      | 98/498 (20%)                      | 6.59% (1.55%, 11.63%)              | 131/512 (26%)                     | 12.52% (7.14%, 17.89%)             |
| Status at end of active treatment phase (EOT)                    | 16/474 (3%)                       | 17/489 (3%)                       | 0.10% (-2.53%, 2.73%)              | 26/506 (5%)                       | 1.76% (-1.12%, 4.64%)              |
| 18m status in those favourable at EOT                            | 21/458 (5%)                       | 63/472 (13%)                      | 8.76% (4.63%, 12.90%)              | 84/480 (18%)                      | 12.91% (8.45%, 17.38%)             |
| 12m status in those favourable at EOT                            | 27/435 (6%)                       | 64/459 (14%)                      | 7.74% (3.28%, 12.19%)              | 81/462 (18%)                      | 11.33% (6.59%, 16.06%)             |
| <b>Modified Intention to Treat (MITT)</b>                        |                                   |                                   |                                    |                                   |                                    |
| Primary analysis: adjusted for stratification factors            | 87/555 (16%)                      | 132/568 (23%)                     | 7.84% (2.73%, 12.95%)              | 132/551 (24%)                     | 9.02% (3.81%, 14.23%)              |
| Adjusted for additional covariates                               |                                   |                                   | 7.36% (2.27%, 12.45%)              |                                   | 8.29% (3.16%, 13.42%)              |
| Unadjusted                                                       |                                   |                                   | 7.56% (2.30%, 12.83%)              |                                   | 8.28% (2.94%, 13.63%)              |
| Reinfections as unfavourable                                     | 97/565 (17%)                      | 145/581 (25%)                     | 7.92% (2.66%, 13.18%)              | 151/570 (26%)                     | 9.59% (4.25%, 14.93%)              |
| Pinetown and Mexico as unfavourable                              | 97/565 (17%)                      | 140/576 (24%)                     | 7.81% (2.63%, 12.99%)              | 150/569 (26%)                     | 9.76% (4.46%, 15.06%)              |
| All deaths as unfavourable                                       | 92/560 (16%)                      | 135/571 (24%)                     | 7.33% (2.14%, 12.52%)              | 132/551 (24%)                     | 8.20% (2.93%, 13.46%)              |
| Secondary bacteriological endpoint                               | 75/555 (14%)                      | 127/567 (22%)                     | 8.86% (3.93%, 13.79%)              | 129/551 (23%)                     | 10.27% (5.19%, 15.35%)             |
| Primary endpoint based on only LJ results                        | 87/546 (16%)                      | 132/554 (24%)                     | 8.10% (2.90%, 13.30%)              | 132/534 (25%)                     | 9.55% (4.24%, 14.86%)              |
| Primary endpoint based only on MGIT result                       | 109/543 (20%)                     | 153/553 (28%)                     | 7.60% (1.90%, 13.30%)              | 158/539 (29%)                     | 9.46% (3.66%, 15.26%)              |
| Status at end of active treatment phase                          | 16/485 (3%)                       | 19/503 (4%)                       | 0.48% (-2.16%, 3.11%)              | 27/513 (5%)                       | 1.96% (-0.90%, 4.83%)              |
| 18m status in those favourable at EOT                            | 31/469 (7%)                       | 75/484 (15%)                      | 8.06% (3.49%, 12.64%)              | 90/486 (19%)                      | 11.14% (6.48%, 15.81%)             |
| 12m status in those favourable at EOT                            | 37/446 (8%)                       | 76/471 (16%)                      | 6.94% (1.90%, 11.98%)              | 87/468 (19%)                      | 9.59% (4.59%, 14.59%)              |
| <b>All randomised patients</b>                                   |                                   |                                   |                                    |                                   |                                    |
| Missing outcome as unfavourable                                  | 172/640 (27%)                     | 219/655 (33%)                     | 6.79% (1.12%, 12.47%)              | 217/636 (34%)                     | 7.12% (1.44%, 12.80%)              |
| Missing outcome as favourable                                    | 87/640 (14%)                      | 132/655 (20%)                     | 6.73% (2.24%, 11.21%)              | 132/636 (21%)                     | 7.75% (3.15%, 12.36%)              |
| Missing outcomes as last observation carried forward             | 119/640 (19%)                     | 165/655 (25%)                     | 6.51% (1.45%, 11.58%)              | 164/636 (26%)                     | 7.27% (2.15%, 12.38%)              |
| <b>All randomised patients excluding late screening failures</b> |                                   |                                   |                                    |                                   |                                    |
| Missing outcome as unfavourable                                  | 132/600 (22%)                     | 181/617 (29%)                     | 7.48% (1.97%, 12.99%)              | 185/604 (31%)                     | 8.76% (3.18%, 14.33%)              |
| Missing outcome as favourable                                    | 87/600 (14%)                      | 132/617 (21%)                     | 7.06% (2.29%, 11.83%)              | 132/604 (22%)                     | 8.02% (3.17%, 12.87%)              |
| Missing outcomes as last observation carried forward             | 101/600 (17%)                     | 148/617 (24%)                     | 7.24% (2.19%, 12.30%)              | 152/604 (25%)                     | 8.68% (3.58%, 13.78%)              |

Table S3B Summary of sub-group analyses. All sub-group analyses use the per protocol classification and are unadjusted.

| Baseline characteristic | Category                | Control arm                       |                                   | Isoniazid arm                      |                      | Ethambutol arm                    |                                    |                      |
|-------------------------|-------------------------|-----------------------------------|-----------------------------------|------------------------------------|----------------------|-----------------------------------|------------------------------------|----------------------|
|                         |                         | N unfavourable / N assessable (%) | N unfavourable / N assessable (%) | Difference from control (97.5% CI) | Test for interaction | N unfavourable / N assessable (%) | Difference from control (97.5% CI) | Test for interaction |
| Site location           | Stellenbosch            | 9/97 (9%)                         | 19/119 (16%)                      | 6.69% (-3.32%, 16.70%)             |                      | 24/122 (20%)                      | 10.39% (-0.03%, 20.82%)            |                      |
|                         | Cape Town               | 9/74 (12%)                        | 16/82 (20%)                       | 7.35% (-5.64%, 20.34%)             |                      | 11/67 (16%)                       | 4.26% (-8.99%, 17.50%)             |                      |
|                         | Other SA                | 5/61 (8%)                         | 8/56 (14%)                        | 6.09% (-7.02%, 19.20%)             |                      | 13/53 (25%)                       | 16.33% (0.92%, 31.74%)             |                      |
|                         | India                   | 12/103 (12%)                      | 17/94 (18%)                       | 6.43% (-4.94%, 17.81%)             |                      | 23/111 (21%)                      | 9.07% (-2.09%, 20.23%)             |                      |
|                         | East Africa             | 5/120 (4%)                        | 12/104 (12%)                      | 7.37% (-0.75%, 15.50%)             |                      | 24/121 (20%)                      | 15.67% (6.57%, 24.76%)             |                      |
|                         | East Asia               | 3/55 (5%)                         | 6/59 (10%)                        | 4.71% (-6.46%, 15.89%)             | p=0.999              | 10/50 (20%)                       | 14.55% (0.13%, 28.96%)             | p=0.620              |
| Gender                  | Female                  | 13/154 (8%)                       | 12/163 (7%)                       | -1.08% (-7.88%, 5.72%)             |                      | 20/155 (13%)                      | 4.46% (-3.39%, 12.31%)             |                      |
|                         | Male                    | 30/356 (8%)                       | 66/351 (19%)                      | 10.38% (4.65%, 16.10%)             | p=0.004              | 85/369 (23%)                      | 14.61% (8.69%, 20.53%)             | p=0.023              |
| BMI                     | <18.4 kg/m <sup>2</sup> | 21/258 (8%)                       | 51/266 (19%)                      | 11.03% (4.41%, 17.65%)             |                      | 63/266 (24%)                      | 15.54% (8.57%, 22.52%)             |                      |
|                         | ≥18.4 kg/m <sup>2</sup> | 22/252 (9%)                       | 27/248 (11%)                      | 2.16% (-3.80%, 8.12%)              | p=0.026              | 42/258 (16%)                      | 7.55% (1.04%, 14.06%)              | p=0.061              |
| Weight band             | < 40 kg                 | 4/50 (8%)                         | 7/44 (16%)                        | 7.91% (-7.15%, 22.97%)             |                      | 9/58 (16%)                        | 7.52% (-6.18%, 21.21%)             |                      |
|                         | 40-45 kg                | 8/80 (10%)                        | 17/90 (19%)                       | 8.89% (-3.03%, 20.81%)             |                      | 27/82 (33%)                       | 22.93% (9.08%, 36.78%)             |                      |
|                         | 45-55 kg                | 21/206 (10%)                      | 35/210 (17%)                      | 6.47% (-0.98%, 13.93%)             |                      | 39/204 (19%)                      | 8.92% (1.15%, 16.70%)              |                      |
|                         | ≥75 kg                  | 10/174 (6%)                       | 19/170 (11%)                      | 5.43% (-1.28%, 12.14%)             | p=0.946              | 30/180 (17%)                      | 10.92% (3.54%, 18.30%)             | p=0.225              |
| Age                     | <31 years               | 17/262 (6%)                       | 34/272 (13%)                      | 6.01% (0.37%, 11.65%)              |                      | 43/262 (16%)                      | 9.92% (3.76%, 16.08%)              |                      |
|                         | ≥31 years               | 26/248 (10%)                      | 44/242 (18%)                      | 7.70% (0.63%, 14.76%)              | p=0.676              | 62/262 (24%)                      | 13.18% (5.86%, 20.50%)             | p=0.446              |
| Race                    | Asian                   | 15/160 (9%)                       | 23/154 (15%)                      | 5.56% (-2.69%, 13.81%)             |                      | 33/161 (20%)                      | 11.12% (2.32%, 19.93%)             |                      |
|                         | Black                   | 19/238 (8%)                       | 26/210 (12%)                      | 4.40% (-2.04%, 10.84%)             |                      | 49/237 (21%)                      | 12.69% (5.60%, 19.78%)             |                      |
|                         | Mixed race              | 9/111 (8%)                        | 27/148 (18%)                      | 10.14% (0.95%, 19.32%)             | p=0.516              | 23/126 (18%)                      | 10.15% (0.49%, 19.80%)             | p=0.883              |
| HIV status              | Negative                | 38/472 (8%)                       | 68/477 (14%)                      | 6.20% (1.65%, 10.76%)              |                      | 91/489 (19%)                      | 10.56% (5.72%, 15.40%)             |                      |
|                         | Positive                | 5/38 (13%)                        | 10/37 (27%)                       | 13.87% (-6.60%, 34.34%)            | p=0.413              | 14/35 (40%)                       | 26.84% (4.58%, 49.10%)             | p=0.113              |
| Resistance to isoniazid | Sensitive               | 38/470 (8%)                       | 69/473 (15%)                      | 6.50% (1.90%, 11.10%)              |                      | 95/479 (20%)                      | 11.75% (6.79%, 16.71%)             |                      |
|                         | Resistant               | 5/29 (17%)                        | 6/34 (18%)                        | 0.41% (-21.09%, 21.90%)            | p=0.533              | 8/39 (21%)                        | 3.27% (-18.11%, 24.65%)            | p=0.382              |
| Cavitation              | Absent                  | 6/96 (6%)                         | 6/104 (6%)                        | -0.48% (-8.03%, 7.06%)             |                      | 13/108 (12%)                      | 5.79% (-3.15%, 14.73%)             |                      |
|                         | Present                 | 34/368 (9%)                       | 60/357 (17%)                      | 7.57% (1.99%, 13.15%)              | p=0.058              | 83/367 (23%)                      | 13.38% (7.43%, 19.33%)             | p=0.118              |
| MGIT Time to positivity | <5 days                 | 19/229 (8%)                       | 36/239 (15%)                      | 6.77% (0.16%, 13.37%)              |                      | 62/254 (24%)                      | 16.11% (8.82%, 23.41%)             |                      |
|                         | ≥5 days                 | 23/266 (9%)                       | 40/263 (15%)                      | 6.56% (0.27%, 12.85%)              | p=0.960              | 43/258 (17%)                      | 8.02% (1.54%, 14.50%)              | p=0.064              |

**Table S4 Recruitment by randomisation stratification factors: centre and weight band at randomisation.**

|                                     |                  | <b>Control</b> | <b>INH-arm</b> | <b>ETH-arm</b> | <b>Total</b> |
|-------------------------------------|------------------|----------------|----------------|----------------|--------------|
| <b>Country and site</b>             |                  |                |                |                |              |
| South Africa                        | Stellenbosch     | 119            | 140            | 136            | <b>395</b>   |
|                                     | Cape Town        | 101            | 103            | 86             | <b>290</b>   |
|                                     | Johannesburg     | 35             | 28             | 29             | <b>92</b>    |
|                                     | Durban           | 18             | 19             | 24             | <b>61</b>    |
|                                     | Brits            | 17             | 16             | 19             | <b>52</b>    |
|                                     | ACTG             | 8              | 7              | 4              | <b>19</b>    |
| India                               | Multiple sites   | 121            | 128            | 127            | <b>376</b>   |
| Tanzania                            | Mbeya            | 48             | 42             | 51             | <b>141</b>   |
|                                     | Moshi            | 26             | 22             | 23             | <b>71</b>    |
| Kenya                               | Nairobi          | 44             | 49             | 43             | <b>136</b>   |
| Thailand                            | CDI, Nonthaburi  | 24             | 19             | 23             | <b>66</b>    |
|                                     | RVH, Bangkok     | 16             | 19             | 18             | <b>53</b>    |
| Malaysia                            | Kuala Lumpur     | 23             | 26             | 20             | <b>69</b>    |
| Zambia                              | Lusaka           | 23             | 23             | 20             | <b>66</b>    |
| China                               | Beijing, Tianjin | 8              | 9              | 5              | <b>22</b>    |
| Mexico                              |                  | 9              | 5              | 8              | <b>22</b>    |
| <b>Weight band at randomisation</b> |                  |                |                |                |              |
|                                     | < 40 kg          | 63 (10%)       | 61 (9%)        | 62 (10%)       | 186 (10%)    |
|                                     | 40-45 kg         | 101 (16%)      | 115 (18%)      | 101 (16%)      | 317 (16%)    |
|                                     | 45-55 kg         | 256 (40%)      | 254 (39%)      | 249 (39%)      | 759 (39%)    |
|                                     | 55-75 kg         | 204 (32%)      | 209 (32%)      | 209 (33%)      | 622 (32%)    |
|                                     | >75 kg           | 16 (3%)        | 16 (2%)        | 15 (2%)        | 47 (2%)      |
| <b>Total randomised</b>             |                  | <b>640</b>     | <b>655</b>     | <b>636</b>     | <b>1931</b>  |



Table S5 Baseline characteristics of all randomised patients. A single patient had missing HIV status. Resistance results were missing for isoniazid for 62 patients, for rifampicin for 61 patients, for moxifloxacin for 77 patients and for pyrazinamide for 94 patients. Cavitation status was missing in 218 patients. 1 patient had missing race.

|                                       |                         | Control regimen  | Isoniazid regimen | Ethambutol regimen | Total            |
|---------------------------------------|-------------------------|------------------|-------------------|--------------------|------------------|
| <b>Total randomised</b>               |                         | 640              | 655               | 636                | 1931             |
| <b>Male N (%)</b>                     | <b>Male</b>             | 448 (70%)        | 450 (69%)         | 448 (70%)          | 1346 (70%)       |
| <b>BMI (kg/m<sup>2</sup>)</b>         | <b>Median (min-max)</b> | 18.4 (12.1-50.9) | 18.3 (12.0-40.7)  | 18.5 (12.2-34.5)   | 18.4 (12.0-50.9) |
| <b>Weight band N(%)</b>               | <b>&lt; 40 kg</b>       | 63 (10%)         | 61 (9%)           | 62 (10%)           | 186 (10%)        |
|                                       | <b>40-45 kg</b>         | 101 (16%)        | 115 (18%)         | 101 (16%)          | 317 (16%)        |
|                                       | <b>45-55 kg</b>         | 256 (40%)        | 254 (39%)         | 249 (39%)          | 759 (39%)        |
|                                       | <b>55-75 kg</b>         | 204 (32%)        | 209 (32%)         | 209 (33%)          | 622 (32%)        |
|                                       | <b>&gt;75 kg</b>        | 16 (3%)          | 16 (2%)           | 15 (2%)            | 47 (2%)          |
| <b>Age N (%)</b>                      | <b>&lt;25 years</b>     | 187 (29%)        | 205 (31%)         | 175 (28%)          | 567 (29%)        |
|                                       | <b>25-&lt;35 years</b>  | 186 (29%)        | 212 (32%)         | 209 (33%)          | 607 (31%)        |
|                                       | <b>35+ years</b>        | 267 (42%)        | 238 (36%)         | 252 (40%)          | 757 (39%)        |
| <b>Race N(%)</b>                      | <b>Black</b>            | 194 (30%)        | 202 (31%)         | 194 (31%)          | 590 (31%)        |
|                                       | <b>Asian</b>            | 296 (46%)        | 277 (42%)         | 291 (46%)          | 864 (45%)        |
|                                       | <b>Mixed race</b>       | 140 (22%)        | 169 (26%)         | 142 (22%)          | 451 (23%)        |
|                                       | <b>Other</b>            | 10 (1%)          | 7 (1%)            | 8 (1%)             | 25 (1%)          |
| <b>Smoking History N (%)</b>          | <b>Never</b>            | 299 (47%)        | 292 (45%)         | 280 (44%)          | 871 (45%)        |
|                                       | <b>Past</b>             | 155 (24%)        | 155 (24%)         | 166 (26%)          | 476 (25%)        |
|                                       | <b>Current</b>          | 186 (29%)        | 208 (32%)         | 190 (30%)          | 584 (30%)        |
| <b>HIV status N (%)</b>               | <b>Positive</b>         | 46 (7%)          | 46 (7%)           | 48 (8%)            | 140 (7%)         |
| <b>Resistance to Isoniazid (%)</b>    | <b>Resistant</b>        | 46 (7%)          | 52 (8%)           | 49 (8%)            | 147 (8%)         |
| <b>Resistance to Rifampicin (%)</b>   | <b>Resistant</b>        | 9 (1%)           | 9 (1%)            | 7 (1%)             | 25 (1%)          |
| <b>Resistance to Moxifloxacin (%)</b> | <b>Resistant</b>        | 13 (2%)          | 8 (1%)            | 9 (1%)             | 30 (2%)          |
| <b>Resistance to Pyrazinamide (%)</b> | <b>Resistant</b>        | 25 (4%)          | 11 (2%)           | 12 (2%)            | 48 (2%)          |
| <b>Cavitation (%)</b>                 | <b>Present</b>          | 457 (79%)        | 442 (76%)         | 428 (76%)          | 1327 (77%)       |

|                               |                      |           |           |           |           |
|-------------------------------|----------------------|-----------|-----------|-----------|-----------|
| <b>Time to positivity (%)</b> | <b>≥ 5 days</b>      | 322 (50%) | 337 (51%) | 320 (50%) | 979 (51%) |
|                               | <b>&lt; 5 days</b>   | 291 (45%) | 290 (44%) | 294 (46%) | 875 (45%) |
|                               | <b>Not available</b> | 27 (4%)   | 28 (4%)   | 22 (3%)   | 77 (4%)   |

Table S6 Baseline characteristics of patients assessable in the MITT population. Resistance results were missing for isoniazid for 24 patients and for pyranamide in 29 patients. Cavitation status was missing in 166 patients.

|                                       |                         | Control regimen  | Isoniazid regimen | Ethambutol regimen | Total            |
|---------------------------------------|-------------------------|------------------|-------------------|--------------------|------------------|
| <b>Total randomised (MITT)</b>        |                         | 555              | 568               | 551                | 1674             |
| <b>Male N (%)</b>                     | <b>Male</b>             | 387 (70%)        | 392 (69%)         | 387 (70%)          | 1166 (70%)       |
| <b>BMI (kg/m<sup>2</sup>)</b>         | <b>Median (min-max)</b> | 18.3 (12.1-50.9) | 18.3 (12.0-40.7)  | 18.4 (12.2-32.6)   | 18.3 (12.0-50.9) |
| <b>Weight band N(%)</b>               | <b>&lt; 40 kg</b>       | 58 (10%)         | 53 (9%)           | 59 (11%)           | 170 (10%)        |
|                                       | <b>40-45 kg</b>         | 91 (16%)         | 98 (17%)          | 86 (16%)           | 275 (16%)        |
|                                       | <b>45-55 kg</b>         | 222 (40%)        | 226 (40%)         | 215 (39%)          | 663 (40%)        |
|                                       | <b>55-75 kg</b>         | 171 (31%)        | 177 (31%)         | 184 (33%)          | 532 (32%)        |
|                                       | <b>&gt;75 kg</b>        | 13 (2%)          | 14 (2%)           | 7 (1%)             | 34 (2%)          |
| <b>Age N (%)</b>                      | <b>&lt;25 years</b>     | 171 (31%)        | 172 (30%)         | 157 (28%)          | 500 (30%)        |
|                                       | <b>25-&lt;35 years</b>  | 159 (29%)        | 185 (33%)         | 181 (33%)          | 525 (31%)        |
|                                       | <b>35+ years</b>        | 225 (41%)        | 211 (37%)         | 213 (39%)          | 649 (39%)        |
| <b>Race N(%)</b>                      | <b>Black</b>            | 178 (32%)        | 177 (31%)         | 172 (31%)          | 527 (31%)        |
|                                       | <b>Asian</b>            | 256 (46%)        | 232 (41%)         | 250 (45%)          | 738 (44%)        |
|                                       | <b>Mixed race</b>       | 120 (22%)        | 157 (28%)         | 129 (23%)          | 406 (24%)        |
|                                       | <b>Other</b>            | 1 (<0.5%)        | 2 (<0.5%)         | 0                  | 3 (<0.5%)        |
| <b>Smoking History N (%)</b>          | <b>Never</b>            | 263 (47%)        | 255 (45%)         | 243 (44%)          | 761 (45%)        |
|                                       | <b>Past</b>             | 128 (23%)        | 125 (22%)         | 142 (26%)          | 395 (24%)        |
|                                       | <b>Current</b>          | 164 (30%)        | 188 (33%)         | 166 (30%)          | 518 (31%)        |
| <b>HIV status N (%)</b>               | <b>Positive</b>         | 43 (8%)          | 40 (7%)           | 40 (7%)            | 123 (7%)         |
| <b>Resistance to Isoniazid (%)</b>    | <b>Resistant</b>        | 32 (6%)          | 41 (7%)           | 41 (7%)            | 114 (7%)         |
| <b>Resistance to Pyrazinamide (%)</b> | <b>Resistant</b>        | 16 (3%)          | 7 (1%)            | 6 (1%)             | 29 (2%)          |
| <b>Cavitation (%)</b>                 | <b>Present</b>          | 398 (72%)        | 389 (68%)         | 383 (70%)          | 1170 (70%)       |
| <b>Time to positivity (%)</b>         | <b>≥ 5 days</b>         | 284 (51%)        | 290 (51%)         | 272 (49%)          | 846 (51%)        |
|                                       | <b>&lt; 5 days</b>      | 254 (46%)        | 260 (46%)         | 263 (48%)          | 777 (46%)        |
|                                       | <b>Not available</b>    | 17 (3%)          | 18 (3%)           | 16 (3%)            | 51 (3%)          |

Table S7 Time to culture negative status of all randomised patients excluding late screening failures.

|                          |                                                              | Control              | INH-arm              | No INH-arm           |              |
|--------------------------|--------------------------------------------------------------|----------------------|----------------------|----------------------|--------------|
| <b>Total randomised</b>  |                                                              | 640                  | 655                  | 636                  |              |
| <b>Total in analysis</b> |                                                              | 600                  | 617                  | 604                  |              |
| <b>LJ solid media</b>    | <b>Person years in follow-up</b>                             | 95.1                 | 80.2                 | 80.8                 |              |
|                          | <b>Culture negative</b>                                      | 570                  | 576                  | 580                  |              |
|                          | <b>Rate per 10 person years (95% CI)</b>                     | 59.93 (55.20, 65.05) | 71.83 (66.19, 77.94) | 71.79 (66.18, 77.88) |              |
|                          | <b>Median time to culture negative status / wks (95% CI)</b> | 6.0 (6.0, 6.1)       | 6.0 (5.1, 6.0)       | 6.0 (5.7, 6.0)       |              |
|                          | <b>Hazard ratio, compared to control</b>                     |                      |                      | 1.25                 | 1.21         |
|                          | <b>95% confidence interval</b>                               |                      |                      | (1.10, 1.40)         | (1.07, 1.35) |
|                          | <b>97.5% confidence interval</b>                             |                      |                      | (1.08, 1.42)         | (1.05, 1.37) |
|                          | <b>Log-rank test, compared to control</b>                    |                      |                      | p=0.0001             | p=0.0011     |
| <b>MGIT liquid media</b> | <b>Person years in follow-up</b>                             | 156.5                | 143.2                | 145.0                |              |
|                          | <b>Culture negative</b>                                      | 550                  | 553                  | 559                  |              |
|                          | <b>Rate per 10 person years (95% CI)</b>                     | 35.14 (32.32, 38.20) | 38.61 (35.52, 41.97) | 38.54 (35.47, 41.87) |              |
|                          | <b>Median time to culture negative status / wks (95% CI)</b> | 11.9 (8.1, 12.0)     | 8.0 (8.0, 9.9)       | 8.0 (8.0, 8.1)       |              |
|                          | <b>Hazard ratio, compared to control</b>                     |                      |                      | 1.17                 | 1.17         |
|                          | <b>95% confidence interval</b>                               |                      |                      | (1.03, 1.31)         | (1.03, 1.31) |
|                          | <b>97.5% confidence interval</b>                             |                      |                      | (1.01, 1.33)         | (1.01, 1.33) |
|                          | <b>Log-rank test, compared to control</b>                    |                      |                      | p=0.0091             | p=0.0045     |

Table S8 Status at end of 8 week intensive phase including all randomised patients excluding late screening failures.

|                                  |                                                               | Control 2EHRZ/4HR | INH-arm 2MHRZ/2MHR     | No INH-arm<br>2EMRZ/2MR |
|----------------------------------|---------------------------------------------------------------|-------------------|------------------------|-------------------------|
| <b>Total randomised</b>          |                                                               | 640               | 655                    | 636                     |
| <b>Analysis population</b>       |                                                               | 600               | 617                    | 604                     |
| <b>LJ solid<br/>media</b>        | <b>Unassessable</b>                                           | 126               | 100                    | 90                      |
|                                  | <b>N Assessable</b>                                           | 474               | 517                    | 514                     |
|                                  | <b>Negative (% N)</b>                                         | 393 (83%)         | 439 (85%)              | 448 (87%)               |
|                                  | <b>Positive (% N)</b>                                         | 77 (16%)          | 73 (14%)               | 63 (12%)                |
|                                  | <b>Died (% N)</b>                                             | 4 (1%)            | 5 (1%)                 | 3 (1%)                  |
|                                  | <b>Difference from control in culture negative (97.5% CI)</b> |                   | 2.52% (-2.41%, 7.45%)  | 3.09% (-1.93%, 8.12%)   |
|                                  | <b>Chi-sq test for independence</b>                           |                   | p = 0.391 (Chi2=0.74)  | p = 0.061 (Chi2=3.51)   |
| <b>MGIT<br/>liquid<br/>media</b> | <b>Unassessable</b>                                           | 128               | 112                    | 120                     |
|                                  | <b>N Assessable</b>                                           | 472               | 505                    | 484                     |
|                                  | <b>Negative (% N)</b>                                         | 267 (57%)         | 309 (61%)              | 295 (61%)               |
|                                  | <b>Positive (% N)</b>                                         | 201 (43%)         | 191 (38%)              | 186 (38%)               |
|                                  | <b>Died (% N)</b>                                             | 4 (1%)            | 5 (1%)                 | 3 (1%)                  |
|                                  | <b>Difference from control in culture negative (97.5% CI)</b> |                   | 4.37% (-2.43%, 11.17%) | 4.62% (-2.31%, 11.54%)  |
|                                  | <b>Chi-sq test for independence</b>                           |                   | p = 0.142 (Chi2=2.15)  | p = 0.169 (Chi2=1.89)   |

Table S9 Time to unfavourable outcome according to PP classification. Analysis includes all randomised patients excluding late screening failures. \*Since the proportion of unfavourable outcomes is much less than 50% it is not possible to estimate *median* time to unfavourable outcome without extrapolation. The 10<sup>th</sup> centile of time to unfavourable outcome shows the time before which 10% of patients had an unfavourable outcome.

|                                                   | Control            | INH-arm           | No INH-arm        |
|---------------------------------------------------|--------------------|-------------------|-------------------|
| <b>Total randomised</b>                           | 640                | 655               | 636               |
| <b>Total in analysis</b>                          | 600                | 617               | 604               |
| <b>Person years in follow-up</b>                  | 771.2              | 736.8             | 725.9             |
| <b>Unfavourable outcomes</b>                      | 43                 | 78                | 105               |
| <b>Rate per 10 person years (95% CI)</b>          | 0.56 (0.41, 0.75)  | 1.06 (0.85, 1.32) | 1.45 (1.19, 1.75) |
| <b>10th centile time to unfavourable outcome*</b> | 84.9 (68.9, 137.1) | 39.3 (35.3, 50.7) | 31.6 (26.1, 38.9) |
| <b>Hazard ratio, compared to control</b>          |                    | 1.87              | 2.56              |
| <b>95% confidence interval</b>                    |                    | (1.17, 2.57)      | (1.65, 3.47)      |
| <b>97.5% confidence interval</b>                  |                    | (1.07, 2.67)      | (1.51, 3.60)      |
| <b>Log-rank test, compared to control</b>         |                    | p=0.0009          | P<0.0001          |

**Table S10 Serious Adverse Events and Deaths.** The table below presents the total number of SAE events and the number and percentage of subjects experiencing each event for system organ classes in which >1% of patients experienced an SAE.

|                             |                           | <b>2EHRZ/4HR<br/>N=639</b> |              | <b>2MHRZ/2MHR<br/>N=655</b> |              | <b>2EMRZ/2MR<br/>N=636</b> |              |
|-----------------------------|---------------------------|----------------------------|--------------|-----------------------------|--------------|----------------------------|--------------|
| <b>Deaths</b>               |                           | 16 (3%)                    |              | 15 (2%)                     |              | 12 (2%)                    |              |
| <b>TB-Related Deaths</b>    |                           | 11 (2%)                    |              | 10 (2%)                     |              | 9 (1%)                     |              |
| <b>SAEs</b>                 |                           |                            |              |                             |              |                            |              |
| <b>System Organ Class</b>   | <b>Preferred Term</b>     | <b>Evt.</b>                | <b>n (%)</b> | <b>Evt.</b>                 | <b>n (%)</b> | <b>Evt.</b>                | <b>n (%)</b> |
| Any                         | Any                       | 105                        | 59(9%)       | 132                         | 62(9%)       | 112                        | 52(8%)       |
| Gastrointestinal Disorders  | Any                       | 10                         | 6(1%)        | 11                          | 6(1%)        | 17                         | 10(2%)       |
|                             | Abdominal Distension      | 0                          | 0(0%)        | 0                           | 0(0%)        | 1                          | 1(0%)        |
|                             | Abdominal Mass            | 0                          | 0(0%)        | 1                           | 1(0%)        | 0                          | 0(0%)        |
|                             | Abdominal Pain            | 1                          | 1(0%)        | 0                           | 0(0%)        | 2                          | 2(0%)        |
|                             | Abdominal Pain Lower      | 0                          | 0(0%)        | 3                           | 2(0%)        | 0                          | 0(0%)        |
|                             | Abdominal Tenderness      | 0                          | 0(0%)        | 1                           | 1(0%)        | 0                          | 0(0%)        |
|                             | Acute Abdomen             | 1                          | 1(0%)        | 0                           | 0(0%)        | 0                          | 0(0%)        |
|                             | Ascites                   | 0                          | 0(0%)        | 0                           | 0(0%)        | 1                          | 1(0%)        |
|                             | Diarrhoea                 | 1                          | 1(0%)        | 0                           | 0(0%)        | 0                          | 0(0%)        |
|                             | Gastrointestinal Disorder | 0                          | 0(0%)        | 1                           | 1(0%)        | 0                          | 0(0%)        |
|                             | Haematemesis              | 1                          | 1(0%)        | 0                           | 0(0%)        | 0                          | 0(0%)        |
|                             | Haematochezia             | 2                          | 1(0%)        | 0                           | 0(0%)        | 0                          | 0(0%)        |
|                             | Nausea                    | 1                          | 1(0%)        | 2                           | 2(0%)        | 2                          | 2(0%)        |
|                             | Pancreatitis              | 1                          | 1(0%)        | 0                           | 0(0%)        | 0                          | 0(0%)        |
|                             | Peptic Ulcer Perforation  | 1                          | 1(0%)        | 0                           | 0(0%)        | 0                          | 0(0%)        |
|                             | Vomiting                  | 1                          | 1(0%)        | 3                           | 3(0%)        | 11                         | 6(1%)        |
| Infections And Infestations | Any                       | 14                         | 13(2%)       | 24                          | 19(3%)       | 14                         | 12(2%)       |
|                             | Appendicitis              | 0                          | 0(0%)        | 1                           | 1(0%)        | 0                          | 0(0%)        |
|                             | Diarrhoea Infectious      | 0                          | 0(0%)        | 1                           | 1(0%)        | 0                          | 0(0%)        |
|                             | Disseminated Tuberculosis | 1                          | 1(0%)        | 0                           | 0(0%)        | 1                          | 1(0%)        |
|                             | Gangrene                  | 0                          | 0(0%)        | 1                           | 1(0%)        | 0                          | 0(0%)        |
|                             | Hepatitis B               | 0                          | 0(0%)        | 1                           | 1(0%)        | 0                          | 0(0%)        |

|                                                 |                                          | 2EHRZ/4HR<br>N=639 |              | 2MHRZ/2MH<br>R<br>N=655 |              | 2EMRZ/2MR<br>N=636 |              |
|-------------------------------------------------|------------------------------------------|--------------------|--------------|-------------------------|--------------|--------------------|--------------|
| <b>Deaths</b>                                   |                                          | 16 (3%)            |              | 15 (2%)                 |              | 12 (2%)            |              |
| <b>TB-Related Deaths</b>                        |                                          | 11 (2%)            |              | 10 (2%)                 |              | 9 (1%)             |              |
| <b>SAEs</b>                                     |                                          |                    |              |                         |              |                    |              |
| <b>System Organ Class</b>                       | <b>Preferred Term</b>                    | <b>Evt.</b>        | <b>n (%)</b> | <b>Evt.</b>             | <b>n (%)</b> | <b>Evt.</b>        | <b>n (%)</b> |
|                                                 | Aspartate Aminotransferase Increased     | 1                  | 1(0%)        | 0                       | 0(0%)        | 1                  | 1(0%)        |
|                                                 | Blood Bilirubin Increased                | 0                  | 0(0%)        | 1                       | 1(0%)        | 0                  | 0(0%)        |
|                                                 | Blood Creatinine Increased               | 0                  | 0(0%)        | 1                       | 1(0%)        | 1                  | 1(0%)        |
|                                                 | Breath Sounds Abnormal                   | 0                  | 0(0%)        | 1                       | 1(0%)        | 0                  | 0(0%)        |
|                                                 | Gamma-Glutamyltransferase Increased      | 2                  | 2(0%)        | 0                       | 0(0%)        | 2                  | 2(0%)        |
|                                                 | Haemoglobin Decreased                    | 0                  | 0(0%)        | 0                       | 0(0%)        | 1                  | 1(0%)        |
|                                                 | Hepatic Enzyme Increased                 | 3                  | 3(0%)        | 3                       | 3(0%)        | 4                  | 4(1%)        |
|                                                 | International Normalised Ratio Increased | 0                  | 0(0%)        | 1                       | 1(0%)        | 0                  | 0(0%)        |
|                                                 | Liver Function Test Abnormal             | 1                  | 1(0%)        | 0                       | 0(0%)        | 0                  | 0(0%)        |
|                                                 | Prothrombin Time Prolonged               | 0                  | 0(0%)        | 2                       | 1(0%)        | 0                  | 0(0%)        |
|                                                 | Respiratory Rate Increased               | 0                  | 0(0%)        | 0                       | 0(0%)        | 1                  | 1(0%)        |
|                                                 | Weight Decreased                         | 2                  | 2(0%)        | 2                       | 2(0%)        | 4                  | 2(0%)        |
| Respiratory, Thoracic And Mediastinal Disorders | Any                                      | 24                 | 14(2%)       | 28                      | 14(2%)       | 20                 | 13(2%)       |
|                                                 | Asphyxia                                 | 0                  | 0(0%)        | 1                       | 1(0%)        | 0                  | 0(0%)        |
|                                                 | Asthma                                   | 0                  | 0(0%)        | 1                       | 1(0%)        | 0                  | 0(0%)        |
|                                                 | Bronchospasm                             | 0                  | 0(0%)        | 0                       | 0(0%)        | 1                  | 1(0%)        |
|                                                 | Cough                                    | 1                  | 1(0%)        | 0                       | 0(0%)        | 0                  | 0(0%)        |
|                                                 | Dysphonia                                | 0                  | 0(0%)        | 1                       | 1(0%)        | 0                  | 0(0%)        |
|                                                 | Dyspnoea                                 | 6                  | 5(1%)        | 2                       | 2(0%)        | 8                  | 6(1%)        |



|                           |                       | <b>2EHRZ/4HR</b><br><b>N=639</b> |              | <b>2MHRZ/2MH</b><br><b>R</b><br><b>N=655</b> |              | <b>2EMRZ/2MR</b><br><b>N=636</b> |              |
|---------------------------|-----------------------|----------------------------------|--------------|----------------------------------------------|--------------|----------------------------------|--------------|
| <b>Deaths</b>             |                       | 16 (3%)                          |              | 15 (2%)                                      |              | 12 (2%)                          |              |
| <b>TB-Related Deaths</b>  |                       | 11 (2%)                          |              | 10 (2%)                                      |              | 9 (1%)                           |              |
| <b>SAEs</b>               |                       |                                  |              |                                              |              |                                  |              |
| <b>System Organ Class</b> | <b>Preferred Term</b> | <b>Evt.</b>                      | <b>n (%)</b> | <b>Evt.</b>                                  | <b>n (%)</b> | <b>Evt.</b>                      | <b>n (%)</b> |
|                           | Haemoptysis           | 8                                | 7(1%)        | 7                                            | 6(1%)        | 2                                | 2(0%)        |
|                           | Haemothorax           | 1                                | 1(0%)        | 0                                            | 0(0%)        | 0                                | 0(0%)        |
|                           | Hydropneumothorax     | 0                                | 0(0%)        | 3                                            | 1(0%)        | 0                                | 0(0%)        |
|                           | Hypoventilation       | 0                                | 0(0%)        | 1                                            | 1(0%)        | 0                                | 0(0%)        |
|                           | Oropharyngeal Pain    | 1                                | 1(0%)        | 0                                            | 0(0%)        | 0                                | 0(0%)        |
|                           | Pleural Effusion      | 1                                | 1(0%)        | 0                                            | 0(0%)        | 1                                | 1(0%)        |
|                           | Pneumonia Aspiration  | 0                                | 0(0%)        | 1                                            | 1(0%)        | 0                                | 0(0%)        |
|                           | Pneumothorax          | 5                                | 2(0%)        | 3                                            | 3(0%)        | 6                                | 3(0%)        |
|                           | Rales                 | 0                                | 0(0%)        | 3                                            | 2(0%)        | 0                                | 0(0%)        |
|                           | Respiratory Distress  | 0                                | 0(0%)        | 0                                            | 0(0%)        | 1                                | 1(0%)        |
|                           | Respiratory Failure   | 1                                | 1(0%)        | 1                                            | 1(0%)        | 1                                | 1(0%)        |
|                           | Rhonchi               | 0                                | 0(0%)        | 2                                            | 1(0%)        | 0                                | 0(0%)        |
|                           | Wheezing              | 0                                | 0(0%)        | 2                                            | 1(0%)        | 0                                | 0(0%)        |
